# Supplementary material for: Machine learning based classification of cells into chronological stages using single-cell transcriptomics
Source: PubMed Central journal article supplement (PMC6249247; doi:10.1038/s41598-018-35218-5), 2018-11-21
Supplement: 41598_2018_35218_MOESM1_ESM.pdf [file 41598_2018_35218_MOESM1_ESM.pdf]

1 **Supplementary Data**

2 **Machine learning based classification of cells into chronological stages using single-cell**  
3 **transcriptomics**

4 Sumeet Pal Singh, Sharan Janjuha, Samata Chaudhuri, Susanne Reinhardt, Annekathrin

5 Kränkel, Sevina Dietz, Anne Eugster, Halil Bilgin, Selçuk Korkmaz, John E. Reid, Gökmen

6 Zararsız, Nikolay Ninov

7

8 **Includes:**

9 Supplementary Figures S1 – S9

10 Supplementary Table S1-S5 Legends

11 Supplementary Methods

12 Supplementary References

13

14 **Supplementary Figure S1**

15

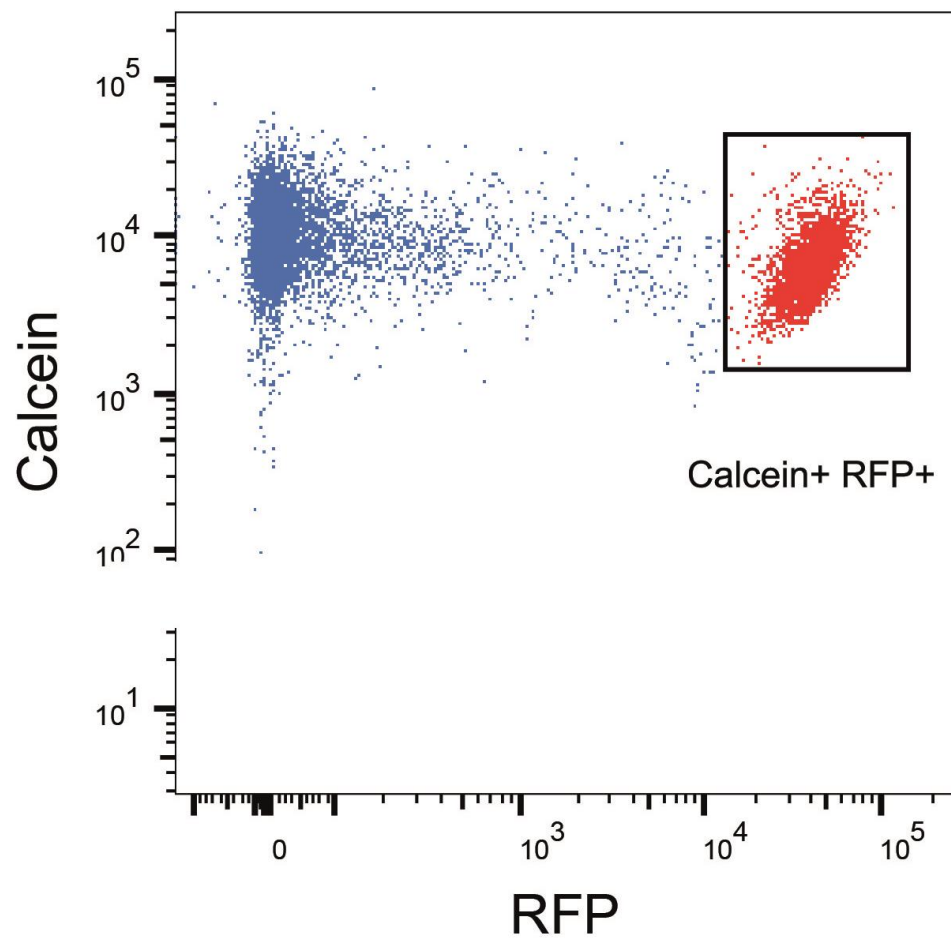

16

17 **Supplementary Figure S1: FACS sort of zebrafish beta-cells**

18 A FACS plot of live RFP-positive cells from *Tg(ins:BB1.0L)* animals at 3 mpf. Calcein labels

19 live cells, while RFP labels beta-cells.

20

21 **Supplementary Figure S2**

**Quality Control for Single-cell Sequencing**

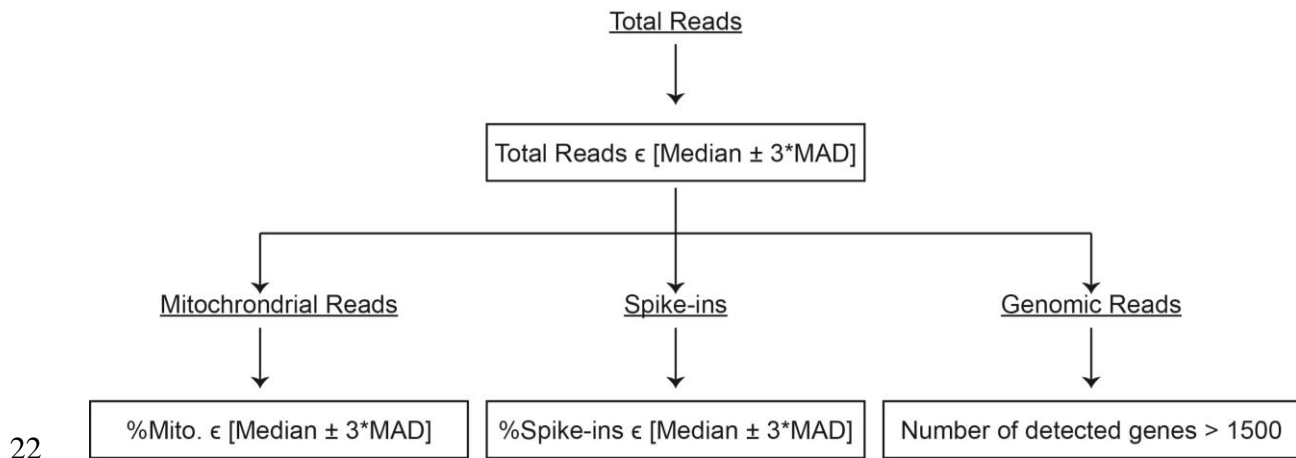

22  
23 **Supplementary Figure S2: Quality control for zebrafish beta-cells used to develop**  
24 **GERAS**

25 A flowchart showing the steps for determining sequencing quality. The following quality  
26 control parameters were obtained for the entire dataset:

- 27 1. The median and median absolute deviation (MAD) for total reads
- 28 2. The median and MAD for % of mitochondrial reads
- 29 3. The median and MAD for % spike-ins
- 30 4. Number of detectable genes

31 Cells passed quality control if they belonged to median  $\pm$  3\*MAD bracket for 1-3 and  
32 contained more than 1500 genes.

33 **Supplementary Figure S3**

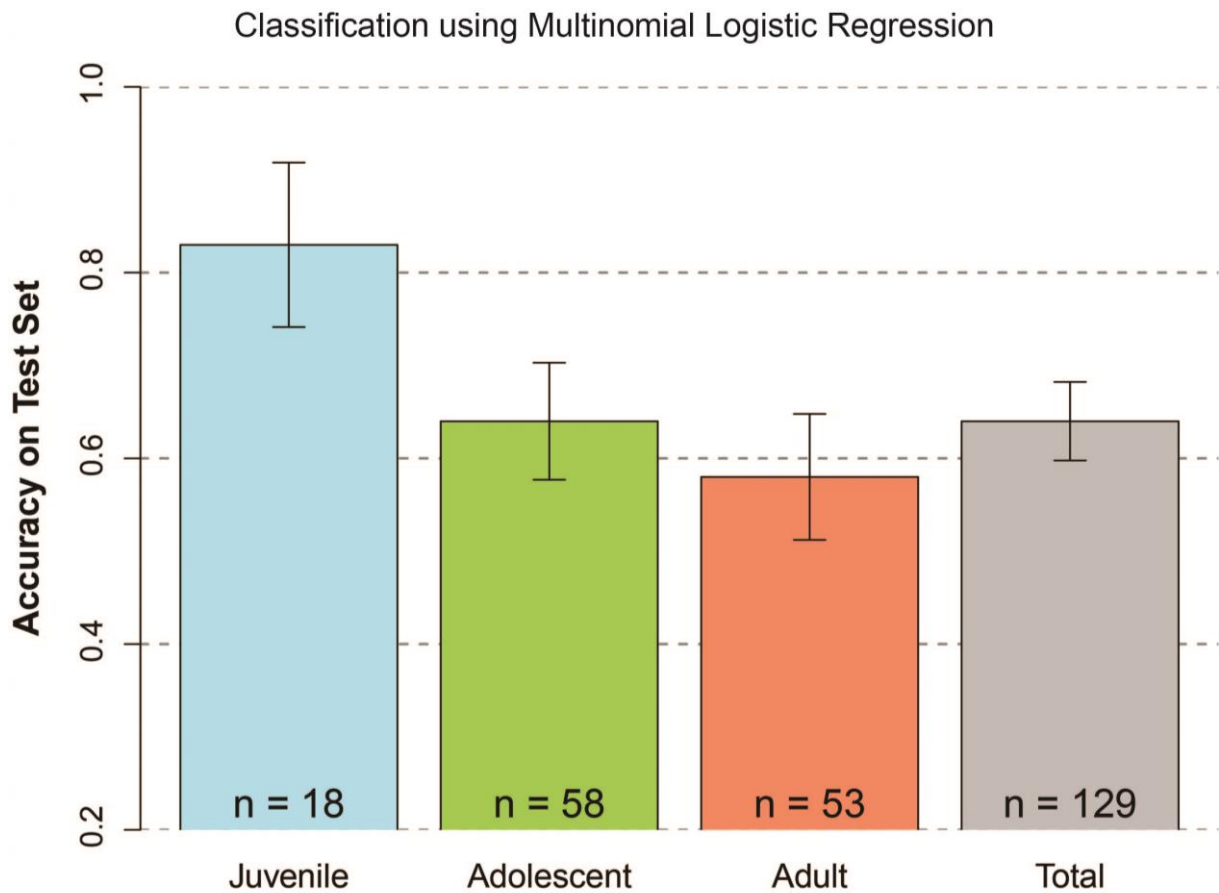

34

35 **Supplementary Figure S3: Classification of chronological stages using Multinomial**  
36 **Logistic Regression**

37 Barplot showing the accuracy of a Multinomial Logistic Regression for classifying the age of  
38 zebrafish beta-cells on the test set – the cells that were excluded from the training of the  
39 logistic regression model. The classifications on the test display an overall accuracy of 64%.  
40 Error bars indicate standard error. Multinomial Logistic Regression was carried out using the  
41 ‘nnet’<sup>1</sup> package in R.

42

43 **Supplementary Figure S4**

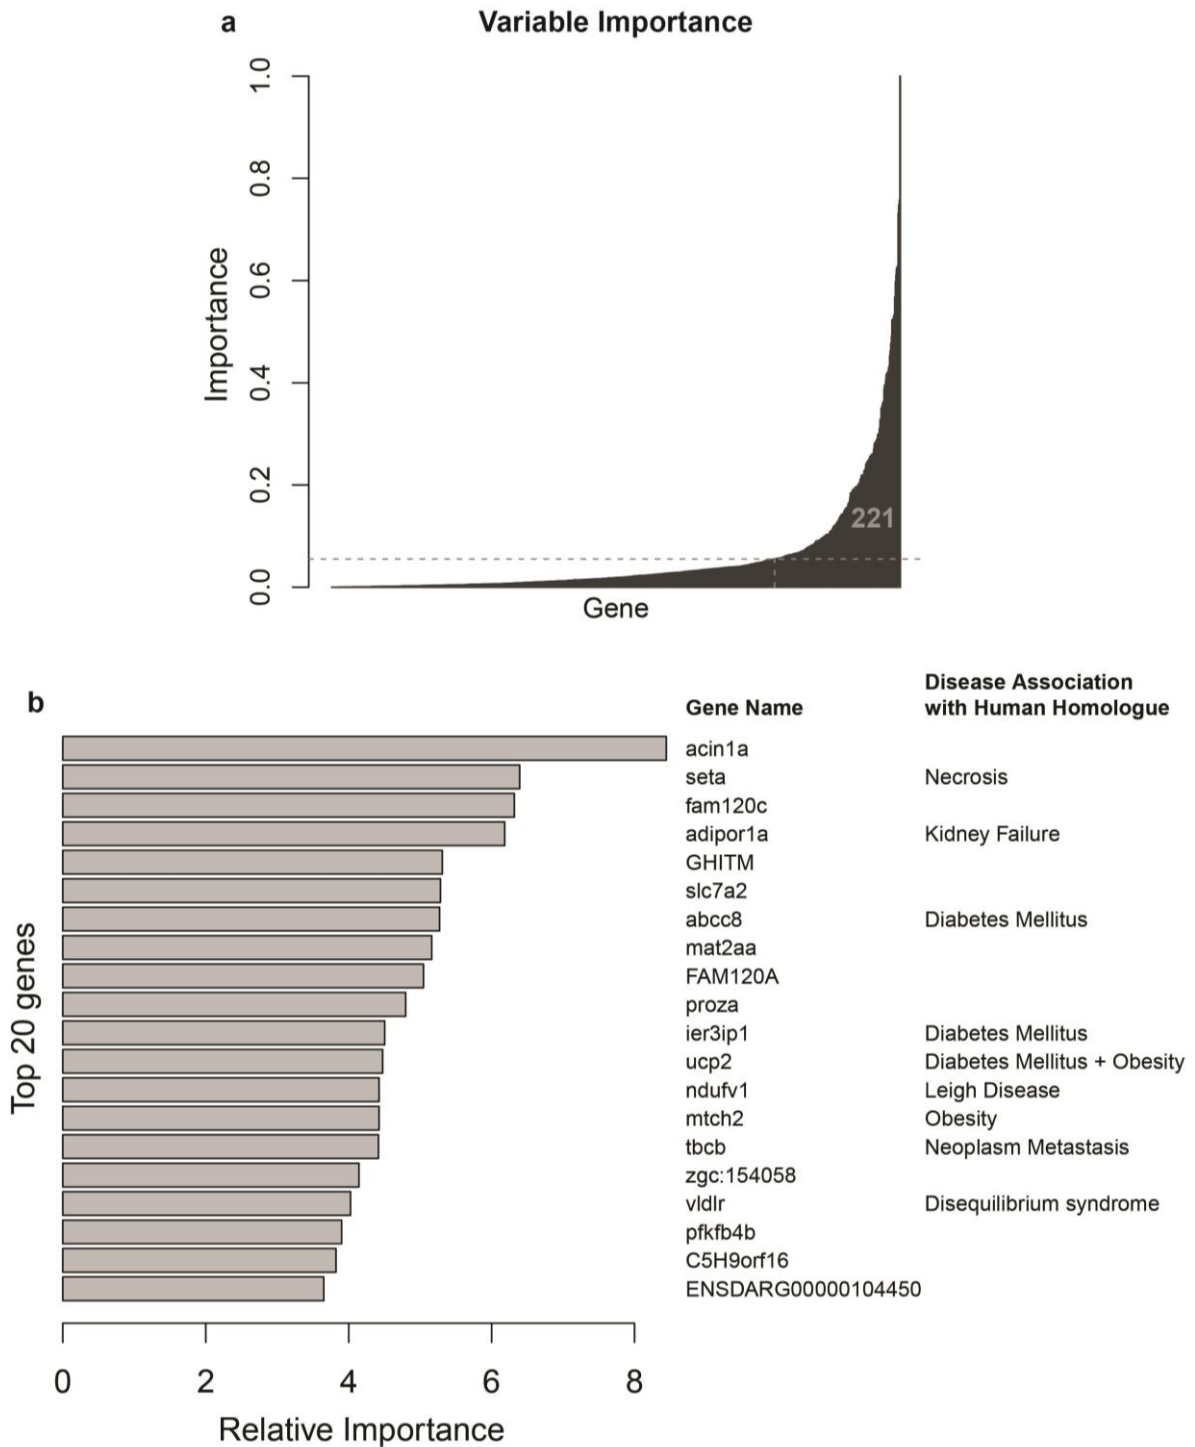

44

45 **Supplementary Figure S4: Variable importance for zebrafish beta-cell GERAS**

46 **(a)** Plot depicting the importance of each variable (gene) for the classification using zebrafish

47 beta-cell GERAS. The importance of each input gene is calculated using the strength

48 (weights) of the neural network connections<sup>2</sup>. An input gene with stronger neural network  
49 connections will be more important than another input gene with weaker neural network  
50 connections. The Y-axis denotes variable importance, with 1 being most important and 0  
51 being least important. On X-axis, all 1000 genes used as input to GERAS are depicted. Dotted  
52 horizontal line depicts the mean of the variable importance. 221 genes (lying right of the  
53 vertical dotted line) have importance higher than the mean.

54 **(b)** Barplot showing the relative importance of the top 20 genes. The X-axis denotes the  
55 relative importance, and the Y-axis lists each gene individually. The names of the genes are  
56 listed, along with the disease associated with their human homologue. Diseases association  
57 were obtained from DisGeNET database<sup>3</sup>.

58 **Supplementary Figure S5**

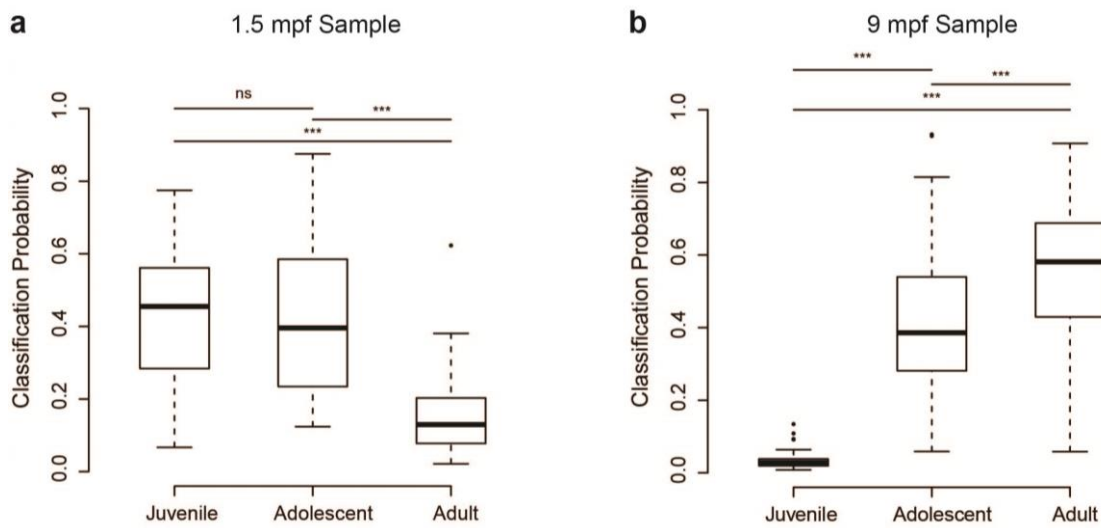

59

60 **Supplementary Figure S5: Classification probability for the ‘Interpolation’ samples**

61 **(a)** Boxplot depicting the classification probability for beta-cells collected from 1.5 mpf  
62 animals. The probability for beta-cells from 1.5 mpf animals to be classified into the  
63 ‘Juvenile’ stage (mean = 0.43) is statistically similar to the probability for the samples to be  
64 classified into the ‘Adolescent’ stage (mean = 0.42). In contrast, the samples display a lower  
65 probability to be classified into the ‘Adult’ stage (mean = 0.15). (ANOVA, p-value < 0.001;  
66 Tukey’s test: ns, p-value > 0.05; \*\*\* p-value < 0.001).

67 **(b)** Boxplot depicting the classification probability for beta-cells collected from 9 mpf  
68 animals. The samples display the highest probability to be classified into the ‘Adult’ stage  
69 (mean = 0.56), followed by classification into the ‘Adolescent’ stage (mean = 0.41). The  
70 samples display the lowest probability to be classified into the ‘Juvenile’ stage (mean = 0.03).  
71 (ANOVA, p-value < 0.001; Tukey’s test: \*\*\* p-value < 0.001).

72 **Supplementary Figure S6**

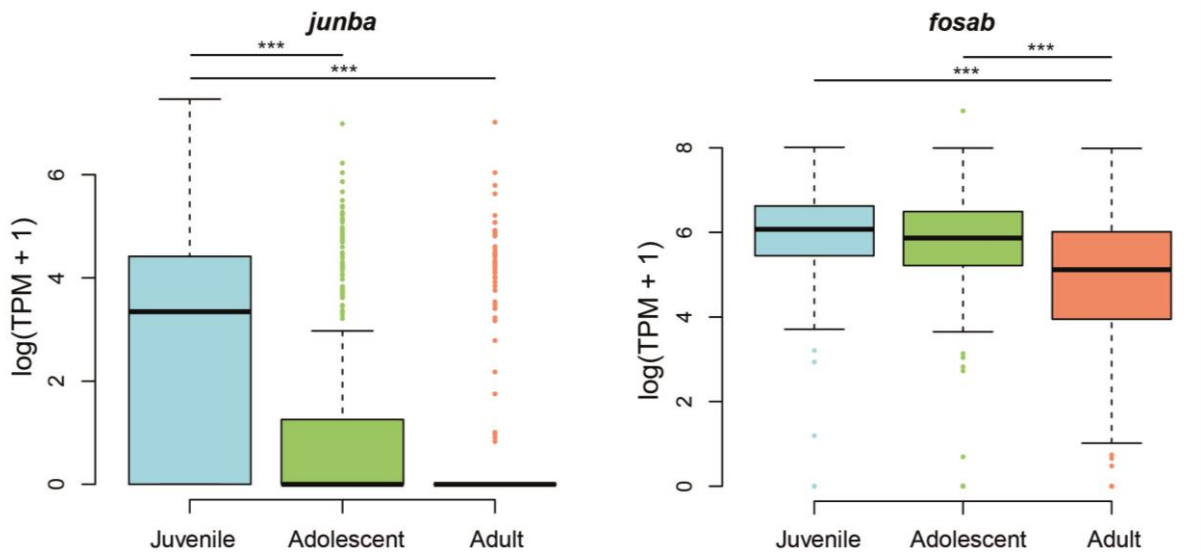

73

74 **Supplementary Figure S6: Gene expression dynamics with age**

75 Tukey-style boxplots showing expression of *junba* (left) and *fosab* (right) in single beta-cells  
76 during aging. Both genes show statistically significant down-regulation with age (t-test using  
77 the ROTS package<sup>4</sup>, \*\*\*p-value < 0.001).



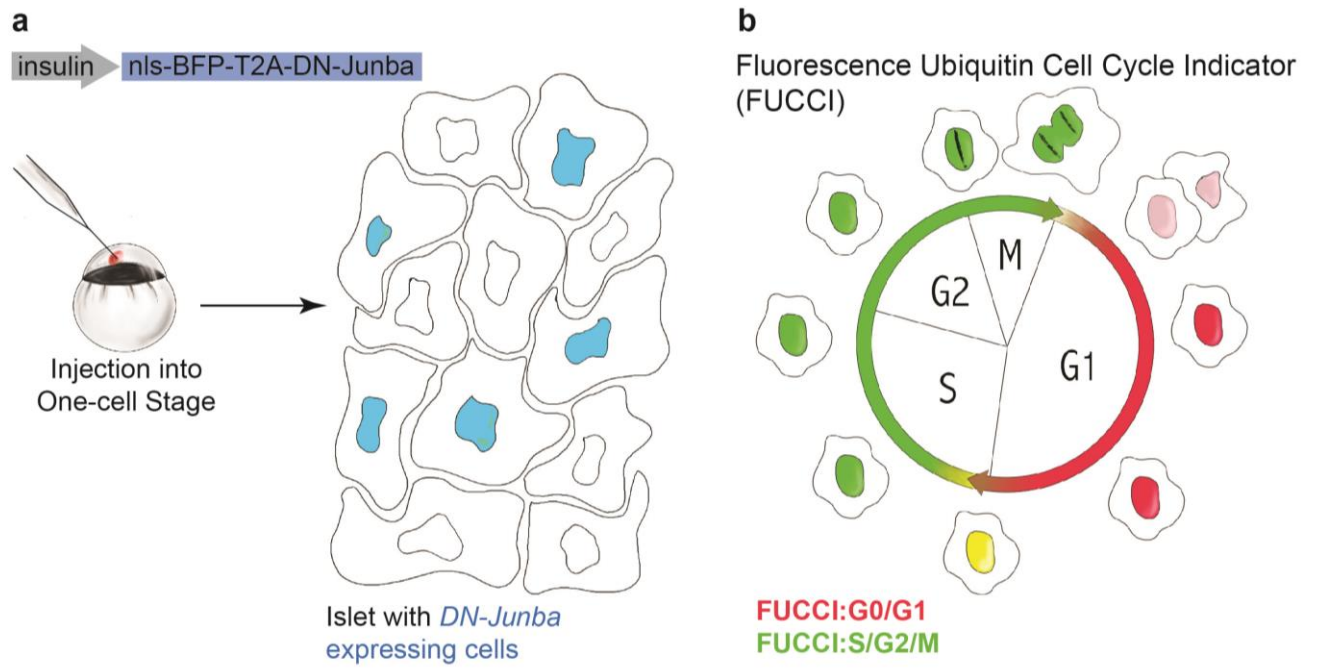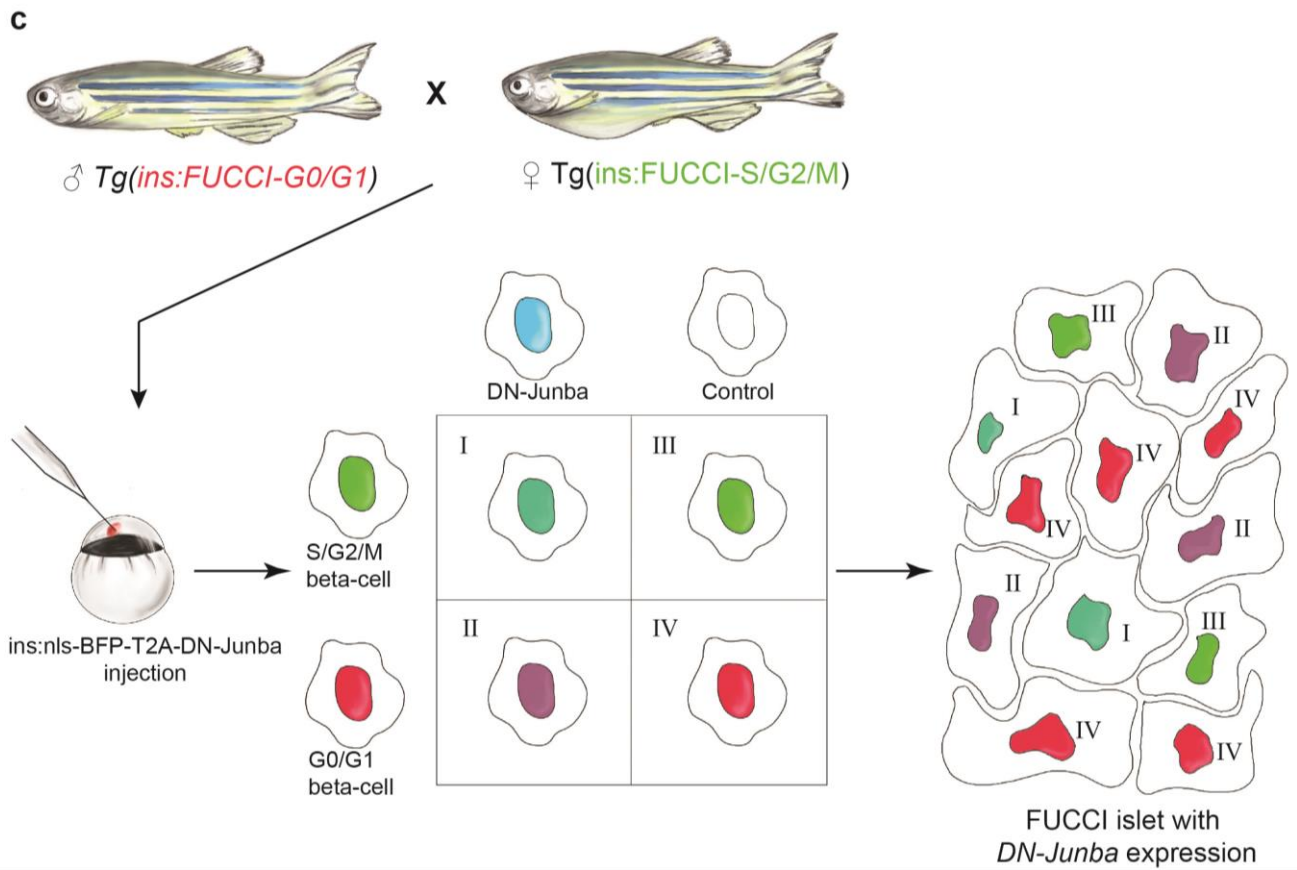

81 **Supplementary Figure S7: Setup of mosaic analysis for evaluating the impact of *DN-***  
82 ***junba* on beta-cell proliferation.**

83 **(a)** Illustration depicting the generation of genetic mosaics. Zebrafish embryos are injected at  
84 one-cell stage with a plasmid expressing the blue fluorescence protein tagged *DN-junba* from  
85 the insulin promoter. The insulin promoter restricts expression to beta-cells. Random  
86 integration of the genetic cassette leads to expression of *DN-junba* in a subset of beta-cells,  
87 which are labeled in blue color.

88 **(b)** A schematic describing labeling of different cell-cycle states using the fluorescence  
89 ubiquitination cell cycle indicator (FUCCI) system. FUCCI system includes two  
90 components<sup>5</sup>. The FUCCI-G0/G1 fusion protein is degraded during S/G2/M phase, while  
91 FUCCI-S/G2/M is spared. This leads to green fluorescence during S/G2/M phase. In contrast,  
92 during G0/G1 phase, FUCCI-S/G2/M is degraded and FUCCI-G0/G1 is spared.

93 **(c)** Combining genetic mosaics with FUCCI system allows comparison of proliferation among  
94 the *DN-junba*-expressing and control cells within the same islet. In this scenario, injection of  
95 plasmid is performed in eggs collected from mating of transgenic animals containing the  
96 individual FUCCI components. The injected animals grow to yield islets with *DN-junba*-  
97 expressing and non-expressing cells. Proliferation is quantified based on the FUCCI-S/G2/M  
98 and FUCCI-G0/G1 reporters.

99

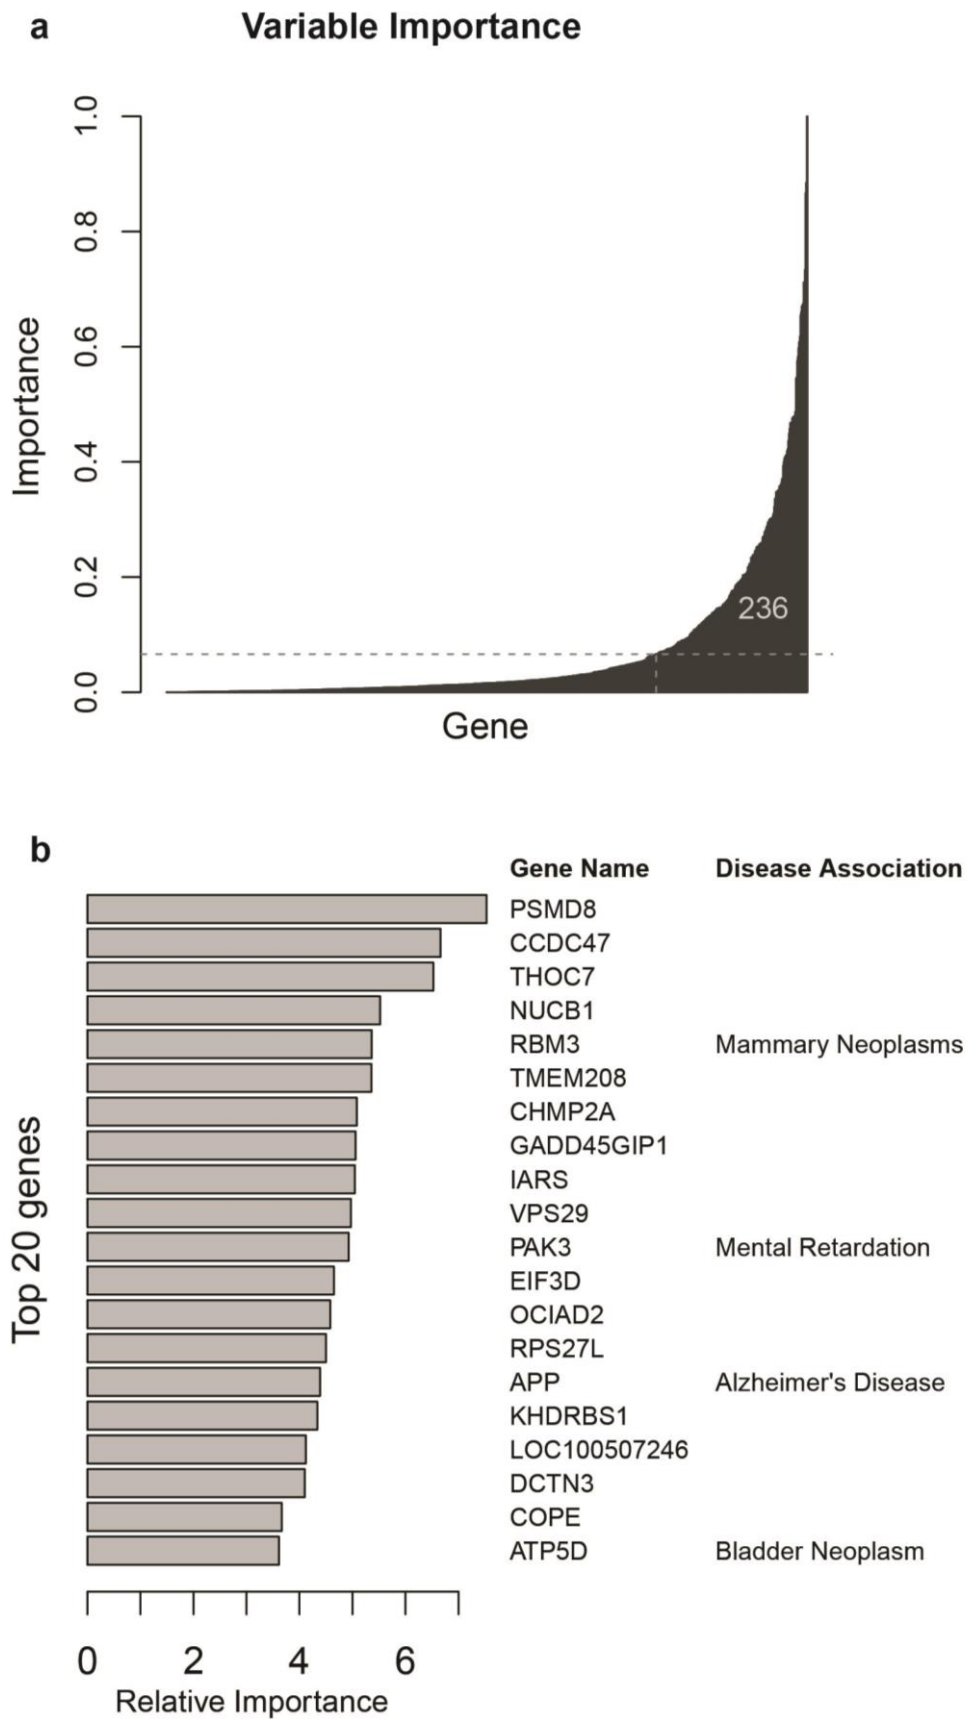

102 **Supplementary Figure S8: Variable importance for human pancreatic GERAS**

103 **(a)** Plot depicting the importance of each variable (gene) for the classification using human  
104 pancreatic GERAS. The Y-axis depicts the importance of the variable from 0 (the lowest) to 1  
105 (the highest). The X-axis shows the 1000 genes used as input to GERAS. The mean of the  
106 variable importance is depicted by the dotted horizontal line; with 236 genes (lying right of  
107 the vertical dotted line) having higher importance than the mean.

108 **(b)** Barplot showing the relative importance of the top 20 genes. Relative importance is  
109 plotted on X-axis, and each gene is individually listed on the Y-axis. The names of the genes,  
110 along with the disease associated with them is stated on the right. Diseases association were  
111 obtained from DisGeNET database<sup>3</sup>.

**Probability for Classification in 'Middle' (38 - 54 yr) Stage**

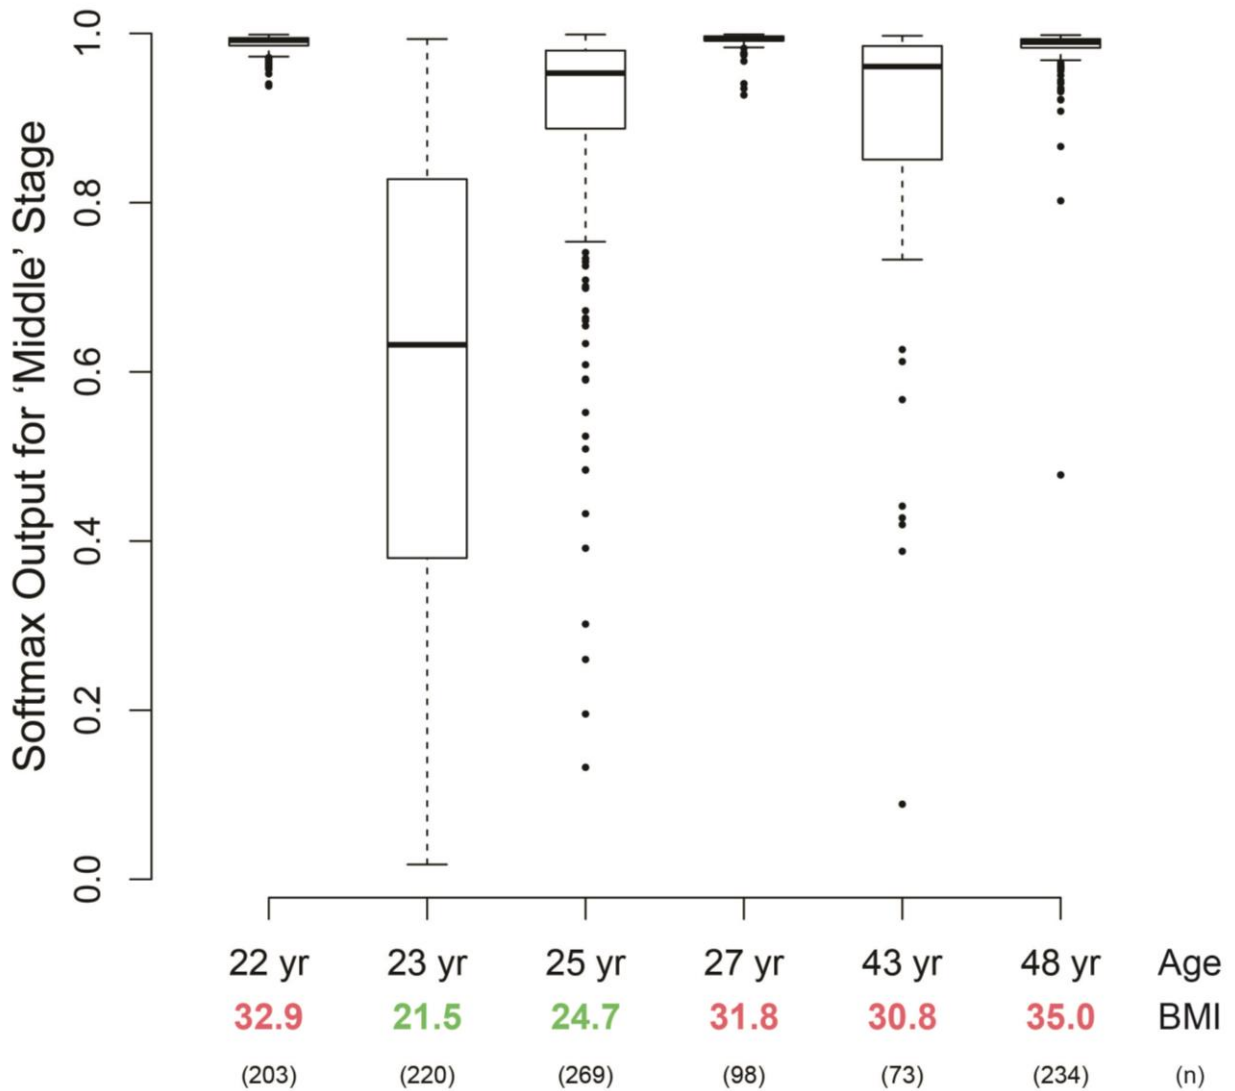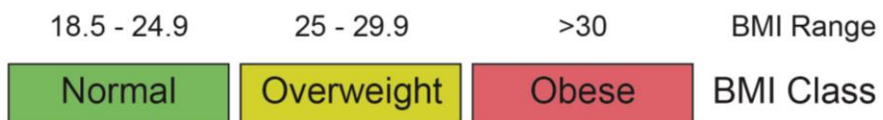

113

114

115

116 **Supplementary Figure S9: Probability of cells from individuals ranging from 22 – 48**  
117 **years to classify in the ‘Middle’ (38 – 54 years) stage**

118 Tukey-style boxplots showing the softmax output for the data from healthy individuals in  
119 Segerstolpe et al.<sup>6</sup> The softmax output for the ‘Middle’ stage of a single cell equals the  
120 probability that the cell would classify in the ‘Middle’ stage. Individuals on the X-axis are  
121 shown in ascending age. BMI for each individual is shown below the age and color coded  
122 according to the BMI ranges indicated below. The BMI ranges are based on world health  
123 organization (WHO) recommendations<sup>7</sup>. Numbers of cells from each individual are indicated  
124 below the BMI values.

125

126 **Supplementary Table Legends**

127

128 **Table S1: Samples for development of GERAS for zebrafish beta-cells (.xls)**

129 A table listing the batches in which beta-cells were collected for the development of GERAS  
130 for zebrafish beta-cells.

131

132 **Table S2: Variable Importance for zebrafish beta-cell GERAS (.xls)**

133 A table listing the 1000-input genes utilized by zebrafish beta-cell GERAS and their  
134 importance towards classification.

135

136 **Table S3: Differential gene expression analysis between the beta-cells classified as  
137 ‘Adult’ or ‘Adolescent’ from zebrafish fed three-times-a-day (.xls)**

138 A table listing the differences in gene expression between beta-cells classified as ‘Adult’ vs.  
139 beta-cells classified as ‘Adolescent’ from the cells collected from zebrafish fed three-times-a-  
140 day. The table lists all the genes in descending order of false-discovery rate (FDR). Genes that  
141 show differential gene expression (FDR < 0.05) are italicized.

142

143 **Table S4: Differential gene expression analysis between the transcriptome of beta-cells  
144 collected zebrafish on intermittent feeding vs. the transcriptome of beta-cells collected  
145 from zebrafish fed three-times-a-day (.xls)**

146 A table listing the differences in gene expression between beta-cells collected from zebrafish  
147 on intermittent feeding vs. three-times-a-day fed zebrafish. The table lists all the genes in  
148 descending order of false-discovery rate (FDR). Genes that show differential gene expression  
149 (FDR < 0.05) are italicized.

150

151 **Table S5: Variable Importance for Human pancreatic GERAS (.xls)**

152 A table listing the 1000-input genes utilized by human pancreatic GERAS and their  
153 importance towards classification.

154



## 155 **Supplementary Methods**

### 156 **Single cell isolation of zebrafish beta-cells**

157 Primary islets from *Tg(ins:BB1.0L; cryaa:RFP)* zebrafish were dissociated into single  
158 cells and sorted using FACS-Aria II (BD Bioscience). Islets were dissociated into single cells  
159 by incubation in TrypLE (ThermoFisher, 12563029) with 0.1% Pluronic F-68 (ThermoFisher,  
160 24040032) at 37 °C in a benchtop shaker set at 450 rpm for 30 min. Following dissociation,  
161 TrypLE was inactivated with 10% FBS, and the cells pelleted by centrifugation at 500g for 10  
162 min at 4 °C. The supernatant was carefully discarded and the pellet re-suspended in 500 uL of  
163 HBSS (without Ca, Mg) + 0.1% Pluronic F-68. To remove debris, the solution was passed  
164 over a 30 µm cell filter (Miltenyi Biotec, 130-041-407). To remove dead cells, calcein violet  
165 (ThermoFisher, C34858) was added at a final concentration of 1 µM and the cell suspension  
166 incubated at room temperature for 20 minutes. The single cell preparation was sorted with the  
167 appropriate gate for identification of beta-cells (RFP+ and calcein+) (Supplementary Fig. S1).  
168 FACS was performed through 100 µm nozzle with index sorting.

169 Beta-cells were collected from seven ages of zebrafish: 1 mpf, 3 mpf, 4 mpf, 6 mpf, 10  
170 mpf, 12 mpf and 14 mpf. For classification, the seven ages were divided into three  
171 chronological stages: 'Juvenile' (1 mpf), 'Adolescent' (3, 4 and 6 mpf) and 'Adult' (10, 12  
172 and 14 mpf). The collection of the beta-cells was carried out in four batches (Supplementary  
173 Table S1), with each batch representing a different collection date. In Supplementary Table  
174 S1, the four batches (collection dates) are labeled as 'A', 'B', 'C' and 'D' for simplification. It  
175 is important to note that each batch (except 'D') contained samples from more than one  
176 chronological stage and conversely each stage (except 'Juvenile') was represented in more  
177 than one batch.

178 **Single cell mRNA sequencing of zebrafish beta-cells from 96-well plates**

179 Cells were sorted into a 96-well plate containing 2 µl of nuclease free water with 0.2%  
180 Triton-X 100 and 4 U murine RNase Inhibitor (NEB), spun down and frozen at -80°C. After  
181 thawing the samples, 2 µl of a primer mix was added (5 mM dNTP (Invitrogen), 0.5 µM dT-  
182 primer\*, 4 U RNase Inhibitor (NEB)). RNA was denatured for 3 minutes at 72°C and the  
183 reverse transcription was performed at 42°C for 90 min after filling up to 10 µl with RT  
184 buffer mix for a final concentration of 1x superscript II buffer (Invitrogen), 1 M betaine, 5  
185 mM DTT, 6 mM MgCl<sub>2</sub>, 1 µM TSO-primer\*, 9 U RNase Inhibitor and 90 U Superscript II.  
186 After synthesis, the reverse transcriptase was inactivated at 70°C for 15 min. The cDNA was  
187 amplified using Kapa HiFi HotStart Readymix (Peqlab) at a final 1x concentration and 0.1  
188 µM UP primer under following cycling conditions: initial denaturation at 98°C for 3 min, 22  
189 cycles [98°C 20 sec, 67°C 15 sec, 72°C 6 min] and final elongation at 72°C for 5 min. The  
190 amplified cDNA was purified using 1x volume of hydrophobic Sera-Mag SpeedBeads (GE  
191 Healthcare) and DNA was eluted in 12 µl nuclease free water. The concentration of the  
192 samples was measured with a Tecan plate reader Infinite 200 pro in 384 well black flat  
193 bottom low volume plates (Corning) using AccuBlue Broad range chemistry (Biotium).

194 For library preparation, 700 pg cDNA in 2 µl was mixed with 0.5 µl tagmentation  
195 enzyme and 2.5 µl Tagment DNA Buffer (Nextera DNA Library Preparation Kit; Illumina)  
196 and tagmented at 55°C for 5 min. Subsequently, Illumina indices were added during PCR  
197 (72°C 3 min, 98°C 30 sec, 12 cycles [98°C 10 sec, 63°C 20 sec, 72°C 1 min], 72°C 5 min)  
198 with 1x concentrated KAPA Hifi HotStart Ready Mix and 0.7 µM dual indexing primers.  
199 After PCR, libraries were quantified with AccuBlue Broad range chemistry, equimolarly  
200 pooled and purified twice with 1x volume Sera-Mag SpeedBeads. This was followed by  
201 Illumina sequencing on a Nextseq500 aiming at an average sequencing depth of 0.5 million  
202 reads per cell.

203

204 \*dT primer: Aminolinker-AAGCAGTGGTATCAACGCAGAGTCGAC T(30) VN

205 \*TSO primer: AAGCAGTGGTATCAACGCAGAGTACATggg

206 \*UP primer: AAGCAGTGGTATCAACGCAGAGT

207 The C1™ Single-Cell mRNA Seq 10-17 µm IFC (© Fluidigm Corporation, CA, USA) was  
208 used to perform mRNA sequencing on single cells. In general, the protocol (PN 100-7168 L1)  
209 suggested by the manufacturer was followed, with some modifications. 1200 cells in PBS  
210 were directly sorted by FACS into the inlet, mixed 3:2 with suspension reagent, resulting in a  
211 final volume of 6 µl. Cells were loaded with the mRNAseq: Cell load protocol, without  
212 staining on the IFC. For RT and amplification, the mRNA Seq: RT & Amp script was run  
213 with the following cycling parameters: 1x 98°C 1 min, 5x (95°C 20-45 sec, 59-49°C with  
214 0.3°C increment/cycle 4 min, 68°C 6 min) 9x (95°C 20-45 sec, 65-49°C with 0.3°C  
215 increment/cycle 30 sec, 68°C 6 min) 7x (95°C 30-45 sec, 65-49°C with 0.3°C increment/cycle  
216 30 sec, 68°C 7 min) and 72°C 10 min using SMART-Seq v4 Ultra Low Input RNA Kit for  
217 Sequencing (Takara BIO USA, INC.). For library preparation, 2 µl cDNA were mixed with  
218 0.5 µl tagmentation enzyme and 2.5 µl Tagment DNA Buffer (Nextera DNA Library  
219 Preparation Kit; Illumina) and tagmented at 55°C for 5 min. Illumina indices were added by  
220 PCR with the following cycling conditions: 1x (72°C 3 min, 98°C 30 sec), 12 x (98°C 10 sec,  
221 63°C 20 sec, 72°C 1 min), 1x (72°C 5 min), using KAPA Hifi HotStart Ready Mix and 0.7  
222 µM final dual indexing primers. Libraries were quantified, equimolarly pooled and purified  
223 twice with 1x volume Sera-Mag SpeedBeads. Illumina sequencing (75bp SE) was done on a  
224 Nextseq500 aiming to achieve an average sequencing depth of 0.5 million reads per cell.

## 225 **Mapping of read counts and quality control**

226 Raw reads in fastq format were trimmed using trim-galore with default parameters to  
227 remove adapter sequences. Trimmed reads were aligned to the zebrafish genome, GRCz10,  
228 using HISAT2<sup>8</sup> with default parameters. htseq-count<sup>9</sup> was used to assign reads to exons thus  
229 eventually getting counts per gene. Using cells that were utilized for developing zebrafish  
230 GERAS (see next section), the following quality control parameters were obtained  
231 (Supplementary Fig. S2):

- 232 1. The median and median absolute deviation (MAD) for total reads
- 233 2. The median and MAD for % of mitochondrial reads
- 234 3. The median and MAD for % spike-ins
- 235 4. Number of detectable genes

236 Cells passed quality control if they belonged to median  $\pm$  3\*MAD bracket for 1-3 and  
237 contained more than 1500 genes. Read counts for all cells that passed quality control are  
238 available from GEO under accession number GSE109881.

## 239 **Development of a Multinomial Logistic Regression Model for zebrafish beta-cells**

240 For development of multinomial logistic regression for zebrafish beta-cells, TPM  
241 normalized counts were used from seven ages of zebrafish distributed into three chronological  
242 stages: 1 mpf ('Juvenile'); 3 mpf, 4 mpf and 6 mpf ('Adolescent'); 10 mpf, 12 mpf and 14  
243 mpf ('Adult'). The entire dataset containing 508 beta-cells were randomly divided into 80%-  
244 20% train-test set. Multinomial Logistic Regression model was developed using the 'nnet'<sup>1</sup>  
245 package in R using the top most variable genes (Supplementary Table S2). With 1000 and  
246 500 top-variable genes, the variance-covariance matrix could not be calculated. Variance-  
247 covariance matrix could be calculated for an input of 250 genes. Thus, we developed a model  
248 using 250-top variable genes using *model*  $\leftarrow$  *multinom* (*stage* ~ *gene*, *data* =

249 *ExpressionData*). The code for developing the Multinomial Logistic Regression Model is  
250 uploaded as ZF\_MultipleLogisticRegression.R on github <sup>10</sup>.

251 The trained model was used to classify the chronological age of the test set.  
252 Accuracy was calculated as the proportion of cells for which the classification matched the  
253 chronological age. By considering each classification as a binomial distribution (a ‘Juvenile’  
254 cell can be classified as ‘Juvenile’ or ‘Not Juvenile’), the standard error was calculated using  
255 the following formula:

$$\text{Standard error} = \sqrt{\frac{\text{accuracy} * (1 - \text{accuracy})}{n}}$$

256 where *n* is the number of cells tested.

### 257 **Construction of the *ins:nls-BFP-T2A-DN-junba*; *cryaa:RFP* plasmid**

258 To generate *ins: nls-BFP-T2A-DN-junba;cryaa:RFP*, a vector was created by  
259 inserting multiple cloning sites (MCS) downstream of the insulin promoter to yield *ins:MCS*;  
260 *cryaa:RFP*. To do so, the plasmid *ins:mAG-zGeminin;cryaa:RFP* was digested with  
261 EcoRI/PacI and ligated with dsDNA generated by annealing two primers harboring the sites  
262 EcoRV, NheI, NsiI, Sall and flanked by EcoRI/PacI overhangs. The plasmid pUC-Kan  
263 consisting of the DN-junba (*junba*<sup>157-325</sup>, consisting of only the DNA binding domain<sup>11</sup>) fused  
264 to *nls-BFP* via T2A sequence flanked by EcoRI/PacI sites was synthesized from GenScript.  
265 *ins:MCS;cryaa:RFP* and the plasmid *pUC-nls-BFP-T2A-DN-junba* were subsequently  
266 digested with EcoRI/PacI to yield compatible fragments, which were ligated together to yield  
267 the final construct. The entire construct was flanked with I-SceI sites to facilitate genomic  
268 insertion.

269 **Analysis of proliferation using mosaic expression of *DN-junba***

270 To identify proliferating beta-cells, the zebrafish beta-cell specific FUCCI system<sup>12</sup>  
271 was used by crossing *Tg(ins:FUCCI-G1)* with *Tg(ins:FUCCI-S/G2/M)*. Embryos obtained  
272 from the mating were injected with *ins:nls-BFP-T2A-DN-junba;cryaa:RFP* plasmid, along  
273 with I-SceI, to facilitate mosaic integration into the genome. At 30 dpf, animals were  
274 euthanized in Tricaine and dissected to isolate the islets. The isolated islets were fixed in 4%  
275 paraformaldehyde (PFA) for 48 hours at 4°C, washed multiple times in PBS and mounted on  
276 slides for confocal microscopy. Confocal images were used for cell-counting. All the  
277 *Tg(ins:FUCCI-S/G2/M)*-positive cells (green fluorescence only) were counted manually  
278 within the BFP-positive and BFP-negative clones. Using Imaris (Bitplane), the total number  
279 of BFP-positive and beta-cells were calculated in the entire islet. For this, the “spots” function  
280 was used after thresholding. For calculating percentages (%), the following calculations were  
281 used:

$$\text{Total BFP-negative cells} = \text{Total beta-cells} - \text{Total BFP-positive cells}$$

*% BFP-positive proliferating cells*

$$= \frac{\text{ins:FUCCI-S/G2/M-positive and BFP-positive cells}}{\text{Total BFP-positive cells}} * 100$$

*% BFP-negative proliferating cells*

$$= \frac{\text{ins:FUCCI-S/G2/M-positive and BFP-negative cells}}{\text{Total BFP-negative cells}} * 100$$

282 **Calculating variable importance for GERAS**

283 Variable importance was calculated as outlined in Gedeon et al.<sup>2</sup>. The code for  
284 carrying out the calculation is shared as source/variableImportance.R on github<sup>10</sup>. The code  
285 uses the weights of the trained neural network to calculate the importance of each variable  
286 (input) used for classification. The output is scaled to 0 (least important) and 1 (most

287 important). This was used to identify the importance of each gene used in zebrafish and  
288 human GERAS. The results were sorted in descending order for plotting. Additionally, the top  
289 20 most important genes were obtained from the sorted list, and their relative importance  
290 calculated using the formula,

$$Relative\ Importance_g = \frac{Importance_g}{\sum_g Importance}$$

291 where  $g$  denotes an individual gene among the top 20. The disease association for each gene  
292 was obtained from DisGeNET database <sup>3</sup>. From the database, an association with a score of  
293 greater than or equal to 0.2 was reported.

#### 294 **Shiny implementation of GERAS classifier**

295 To enable easy access to classifications using GERAS, a Shiny app was developed.  
296 The app is freely available on Github <sup>10</sup>. The app provides a graphic-user interface (GUI) for  
297 users to make chronological age classifications using a pre-trained GERAS model. The users  
298 can upload normalized counts, verify the uploaded data, and obtain classifications in a  
299 downloadable comma-separated (csv) file.

300

301

302

303 **Supplementary References:**

304

305 1. Venables, W. N. & Ripley, B. D. *Modern Applied Statistics with S*. (Springer, 2002).

306 2. Gedeon, T. D. Data mining of inputs: analysing magnitude and functional measures.  
307 *Int. J. Neural Syst.* **8**, 209–18 (1997).

308 3. Piñero, J. *et al.* DisGeNET: a comprehensive platform integrating information on  
309 human disease-associated genes and variants. *Nucleic Acids Res.* **45**, D833–D839  
310 (2017).

311 4. Suomi, T., Seyednasrollah, F., Jaakkola, M. K., Faux, T. & Elo, L. L. ROTS: An R  
312 package for reproducibility-optimized statistical testing. *PLOS Comput. Biol.* **13**,  
313 e1005562 (2017).

314 5. Sakaue-Sawano, A. *et al.* Visualizing spatiotemporal dynamics of multicellular cell-  
315 cycle progression. *Cell* **132**, 487–98 (2008).

316 6. Segerstolpe, Å. *et al.* Single-Cell Transcriptome Profiling of Human Pancreatic Islets  
317 in Health and Type 2 Diabetes. *Cell Metab.* 593–607 (2016).  
318 doi:10.1016/j.cmet.2016.08.020

319 7. World Health Organization. Global database on body mass index. (2011).

320 8. Kim, D., Langmead, B. & Salzberg, S. L. HISAT: a fast spliced aligner with low  
321 memory requirements. *Nat. Methods* **12**, 357–360 (2015).

322 9. Anders, S., Pyl, P. T. & Huber, W. HTSeq--a Python framework to work with high-  
323 throughput sequencing data. *Bioinformatics* **31**, 166–169 (2015).

324 10. Singh, S. P. GERAS (GENetic Referene for Age of Single-cell).



325 <https://github.com/sumeetpalsingh/GERAS2017> (2017).

326 11. Castellazzi, M. *et al.* Overexpression of c-jun, junB, or junD affects cell growth  
327 differently. *Proc. Natl. Acad. Sci. U. S. A.* **88**, 8890–4 (1991).

328 12. Ninov, N. *et al.* Metabolic regulation of cellular plasticity in the pancreas. *Curr. Biol.*  
329 **23**, 1242–1250 (2013).

330
